# Supplementary material
Source: publisher figshare collection journal article supplement (https://frontiersin.figshare.com/ndownloader/files/27659127)
Supplement: Supplementary file [file 27659127]

## Appendix 1 - Stakeholder questionnaire: Risk perceptions and preferences in mitigating the SARS-CoV-2 epidemic in Romania

Expertize / Field of work

Sector/industry: Government / Institute for public health / Medical facility / Public sector / Private sector / Academia / Non-governmental sector

1. For Romania, what would you consider to be an unacceptably high mortality caused by COVID-19?

---

|                                          |                                           |                                            |                                            |                                             |                                                |                                            |
|------------------------------------------|-------------------------------------------|--------------------------------------------|--------------------------------------------|---------------------------------------------|------------------------------------------------|--------------------------------------------|
| <input type="checkbox"/> 1,001-<br>5,000 | <input type="checkbox"/> 5,001-<br>10,000 | <input type="checkbox"/> 10,001-<br>20,000 | <input type="checkbox"/> 20,001-<br>50,000 | <input type="checkbox"/> 50,001-<br>100,000 | <input type="checkbox"/> 100,001-<br>1,000,000 | <input type="checkbox"/> over<br>1,000,000 |
|------------------------------------------|-------------------------------------------|--------------------------------------------|--------------------------------------------|---------------------------------------------|------------------------------------------------|--------------------------------------------|

---

2. In your view, how serious is the risk of high mortality rates caused by COVID-19?

---

|                                       |                                  |                                           |                                           |                                             |
|---------------------------------------|----------------------------------|-------------------------------------------|-------------------------------------------|---------------------------------------------|
| <input type="checkbox"/> very serious | <input type="checkbox"/> serious | <input type="checkbox"/> somewhat serious | <input type="checkbox"/> not very serious | <input type="checkbox"/> not serious at all |
|---------------------------------------|----------------------------------|-------------------------------------------|-------------------------------------------|---------------------------------------------|

---

3. How likely do you think it is for the SARS-CoV-2 epidemic in Romania to have a high mortality rate, if left unmitigated?

---

|                                      |                                 |                                          |                                          |                                   |
|--------------------------------------|---------------------------------|------------------------------------------|------------------------------------------|-----------------------------------|
| <input type="checkbox"/> very likely | <input type="checkbox"/> likely | <input type="checkbox"/> somewhat likely | <input type="checkbox"/> not very likely | <input type="checkbox"/> unlikely |
|--------------------------------------|---------------------------------|------------------------------------------|------------------------------------------|-----------------------------------|

---

4. What is, in your view, the most pressing problem in Romania brought by the SARS-CoV-2 pandemic?

## A Multi-Criteria Framework for Pandemic Response Measures

5. In your view, which of the following non-pharmaceutical measures to contain the SARS-CoV-2 epidemic in Romania would be better? Drag the slider scale using the mouse to indicate the order of preferences.

- ❖ No other action is taken except for pharmaceutical measures and case isolation;
- ❖ Health system coordination, public communication encouraging increased hygiene and personal protection, case isolation and localized action (closing a school/workplace in case of a number of cases) - *influenza protocol*
- ❖ Health system coordination, public communication encouraging increased hygiene and personal protection, case isolation, mild social distancing measures (large public gatherings banned, work from home where possible, social distancing recommended) - *Sweden's policy*
- ❖ Health system coordination, public communication encouraging increased hygiene and personal protection, case isolation, mild social distancing measures (large public gatherings banned, work from home where possible, social distancing recommended), contact tracing involving publicly disclosed detailed location information of individuals that tested positive for COVID-19 - *South Korea's policy*
- ❖ Health system coordination, public communication encouraging increased hygiene and personal protection, case isolation, mild social distancing measures (large public gatherings banned, work from home where possible, social distancing recommended), complete physical isolation of the elderly from other age groups for 12 weeks - *Enhanced distancing for vulnerable groups*
- ❖ Health system coordination, public communication encouraging increased hygiene and personal protection, case isolation, strict social distancing measures (large public gatherings banned, work from home where possible, school and university closures, restaurants and shopping malls closures, restricted mobility) - *Lockdown*

6. Is there any other set of measures you believe would have been better than any of the ones described at Question 5? Briefly indicate what that would be.

7. Which are, in your view, the main concerns to be addressed by governmental responses to the SARS-CoV-2 pandemic? Drag the slider scale using the mouse to specify what has more priority for you:

- i. Health and epidemiologic aspects
- ii. Economic aspects
- iii. Social and behavioral aspects
- iv. Environmental aspects
- v. Political and governance aspects

8. What health problems do you think are more important to limit during a SARS-CoV-2 epidemic in Romania? Drag the slider scale using the mouse to specify what should be a priority to address by mitigation actions:

- i. Reducing the number of direct COVID-19 fatalities

## A Multi-Criteria Framework for Pandemic Response Measures

- ii. Reducing the number of indirect fatalities, caused by healthcare, economic or social problems brought by the epidemic

9. Which are, in your view, the most important economic aspects to be addressed in a pandemic response action? Drag the slider scale using the mouse to specify which issues have more priority for you:

- i. The short-term costs of the pandemic
- ii. Unemployment
- iii. Taxes and budget
- iv. Specific industries affected
- v. Growing industries

10. Which are, in your view, the most important social aspects to be addressed in a pandemic response action? Drag the slider scale using the mouse to specify which issues have more priority for you:

- i. Preserving human rights
- ii. Protecting vulnerable groups
- iii. Avoiding the increase of criminality rates
- iv. Preserving mental health
- v. Ensuring access to education and training

11. Which are, in your view, the most important political aspects to be addressed in a pandemic response action? Drag the slider scale using the mouse to specify which issues have more priority for you:

- i. Reducing the risk of short-term governmental abuse
- ii. Ensuring citizen approval of measures to be taken
- iii. Maintaining or increasing trust in government
- iv. Increasing resilience and preparedness for hazard events

12. What is your opinion on the following statements? Choose the option which is closest to your view.

---

|                                                 |                                               |                                                              |                                            |                                              |
|-------------------------------------------------|-----------------------------------------------|--------------------------------------------------------------|--------------------------------------------|----------------------------------------------|
| <input type="checkbox"/> completely<br>disagree | <input type="checkbox"/> somewhat<br>disagree | <input type="checkbox"/> I neither<br>agree, nor<br>disagree | <input type="checkbox"/> somewhat<br>agree | <input type="checkbox"/> completely<br>agree |
|-------------------------------------------------|-----------------------------------------------|--------------------------------------------------------------|--------------------------------------------|----------------------------------------------|

---

## A Multi-Criteria Framework for Pandemic Response Measures

- ❖ The number of direct COVID-19 fatalities is more important than the effect of climate change and pollution on people's health in Romania.
- ❖ The number of direct COVID-19 fatalities is more important than unemployment levels in Romania.
- ❖ The number of direct COVID-19 fatalities is more important than mental health.
- ❖ The number of direct COVID-19 fatalities is more important than the risk of short-term governmental abuses.
- ❖ The number of direct COVID-19 fatalities is more important than ensuring access to education for children and young students.
- ❖ The number of indirect fatalities is more important than the citizen approval of governmental action in response to the pandemic.
- ❖ The short term costs of the measures taken by the government are more important than the citizen approval of governmental action in response to the pandemic.
- ❖ The protection of vulnerable groups is more important than the risk of short-term governmental abuses.
- ❖ The protection of vulnerable groups is more important than the economic impact on specific industries.
- ❖ The number of direct COVID-19 fatalities is more important than the preservation of human rights.

13. Which are the main sources you use for information on COVID-19 related issues? Select the frequency of use from 1 - most often, 2 - often, 3 - sometimes, 4 - rarely, 5 - never.

|                                     |                            |                            |                            |                            |                            |
|-------------------------------------|----------------------------|----------------------------|----------------------------|----------------------------|----------------------------|
| TV                                  | <input type="checkbox"/> 1 | <input type="checkbox"/> 2 | <input type="checkbox"/> 3 | <input type="checkbox"/> 4 | <input type="checkbox"/> 5 |
| Radio                               | <input type="checkbox"/> 1 | <input type="checkbox"/> 2 | <input type="checkbox"/> 3 | <input type="checkbox"/> 4 | <input type="checkbox"/> 5 |
| Print newspapers                    | <input type="checkbox"/> 1 | <input type="checkbox"/> 2 | <input type="checkbox"/> 3 | <input type="checkbox"/> 4 | <input type="checkbox"/> 5 |
| National online news platforms      | <input type="checkbox"/> 1 | <input type="checkbox"/> 2 | <input type="checkbox"/> 3 | <input type="checkbox"/> 4 | <input type="checkbox"/> 5 |
| International online news platforms | <input type="checkbox"/> 1 | <input type="checkbox"/> 2 | <input type="checkbox"/> 3 | <input type="checkbox"/> 4 | <input type="checkbox"/> 5 |

## A Multi-Criteria Framework for Pandemic Response Measures

|                                      |                            |                            |                            |                            |                            |
|--------------------------------------|----------------------------|----------------------------|----------------------------|----------------------------|----------------------------|
| Social media                         | <input type="checkbox"/> 1 | <input type="checkbox"/> 2 | <input type="checkbox"/> 3 | <input type="checkbox"/> 4 | <input type="checkbox"/> 5 |
| National institutional websites      | <input type="checkbox"/> 1 | <input type="checkbox"/> 2 | <input type="checkbox"/> 3 | <input type="checkbox"/> 4 | <input type="checkbox"/> 5 |
| International institutions' websites | <input type="checkbox"/> 1 | <input type="checkbox"/> 2 | <input type="checkbox"/> 3 | <input type="checkbox"/> 4 | <input type="checkbox"/> 5 |
| Academic outlets                     | <input type="checkbox"/> 1 | <input type="checkbox"/> 2 | <input type="checkbox"/> 3 | <input type="checkbox"/> 4 | <input type="checkbox"/> 5 |
| NGOs                                 | <input type="checkbox"/> 1 | <input type="checkbox"/> 2 | <input type="checkbox"/> 3 | <input type="checkbox"/> 4 | <input type="checkbox"/> 5 |

14. How much do you trust the following sources of information? Select for each whether you have 1 - complete trust, 2 - some trust, 3 - little trust, 4 - very little trust, 5 - no trust.

|                                     |                            |                            |                            |                            |                            |
|-------------------------------------|----------------------------|----------------------------|----------------------------|----------------------------|----------------------------|
| TV                                  | <input type="checkbox"/> 1 | <input type="checkbox"/> 2 | <input type="checkbox"/> 3 | <input type="checkbox"/> 4 | <input type="checkbox"/> 5 |
| Radio                               | <input type="checkbox"/> 1 | <input type="checkbox"/> 2 | <input type="checkbox"/> 3 | <input type="checkbox"/> 4 | <input type="checkbox"/> 5 |
| Print newspapers                    | <input type="checkbox"/> 1 | <input type="checkbox"/> 2 | <input type="checkbox"/> 3 | <input type="checkbox"/> 4 | <input type="checkbox"/> 5 |
| National online news platforms      | <input type="checkbox"/> 1 | <input type="checkbox"/> 2 | <input type="checkbox"/> 3 | <input type="checkbox"/> 4 | <input type="checkbox"/> 5 |
| International online news platforms | <input type="checkbox"/> 1 | <input type="checkbox"/> 2 | <input type="checkbox"/> 3 | <input type="checkbox"/> 4 | <input type="checkbox"/> 5 |
| Social media                        | <input type="checkbox"/> 1 | <input type="checkbox"/> 2 | <input type="checkbox"/> 3 | <input type="checkbox"/> 4 | <input type="checkbox"/> 5 |

## A Multi-Criteria Framework for Pandemic Response Measures

|                                      |                            |                            |                            |                            |                            |
|--------------------------------------|----------------------------|----------------------------|----------------------------|----------------------------|----------------------------|
| National institutional websites      | <input type="checkbox"/> 1 | <input type="checkbox"/> 2 | <input type="checkbox"/> 3 | <input type="checkbox"/> 4 | <input type="checkbox"/> 5 |
| International institutions' websites | <input type="checkbox"/> 1 | <input type="checkbox"/> 2 | <input type="checkbox"/> 3 | <input type="checkbox"/> 4 | <input type="checkbox"/> 5 |
| Academic outlets                     | <input type="checkbox"/> 1 | <input type="checkbox"/> 2 | <input type="checkbox"/> 3 | <input type="checkbox"/> 4 | <input type="checkbox"/> 5 |
| NGOs                                 | <input type="checkbox"/> 1 | <input type="checkbox"/> 2 | <input type="checkbox"/> 3 | <input type="checkbox"/> 4 | <input type="checkbox"/> 5 |
